# Supplementary figures and images for: A polymer lab-on-a-chip for magnetic immunoassay with on-chip sampling and detection capabilities
Source: Royal Society of Chemistry journal article supplement (doi:10.1039/b715569g), 2008-01-01

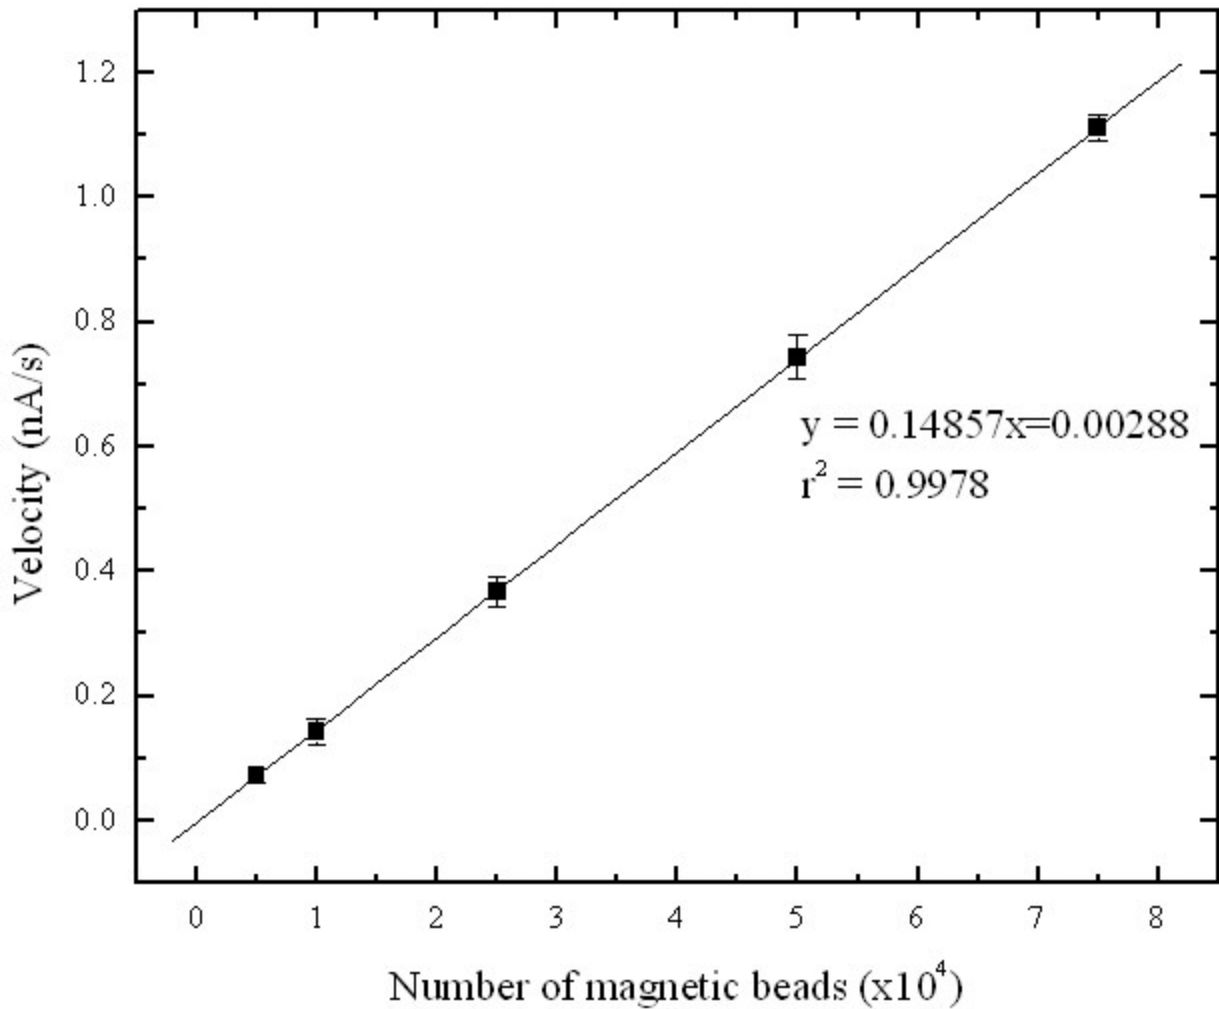

Supplement: b715569g.pdf [file b715569g.pdf]
